# Supplementary material for: New Vegetable Brassica Foods: A Promising Source of Bioactive Compounds
Source: MDPI journal article supplement (doi:10.3390/foods10122911), 2021-11-24

**Figure S1.** UHPLC chromatograms of glucosinolate profiles in tops and leaves of the species *Brassica rapa*, *Brassica oleracea* and *Brassica napus*.

Peaks:

| Number | Name                                   | Retention time |
|--------|----------------------------------------|----------------|
| 1      | Glucoiberin                            | 1.298          |
| 2      | Progoitrin                             | 1.7            |
| 3      | Glucoraphanin                          | 2.1            |
| 4      | Sinigrin                               | 2.25           |
| 5      | Glucoalysin                            | 3.2            |
| 6      | Gluconapin                             | 3.8            |
| 7      | Hydroxyglucobrassicin                  | 4.217          |
| 8      | Glucoiverberin                         | 4.6            |
| 9      | Glucobrassicin                         | 5              |
| 10     | Glucotropaeolin<br>(internal standard) | 5.166          |
| 11     | Glucoerucin                            | 5.3            |
| 12     | Glubrassicin                           | 5.6            |
| 13     | Gluconasturtin                         | 6.225          |
| 14     | Neoglucobrassicin                      | 7.213          |

***Brassica rapa***

Tops

mAU

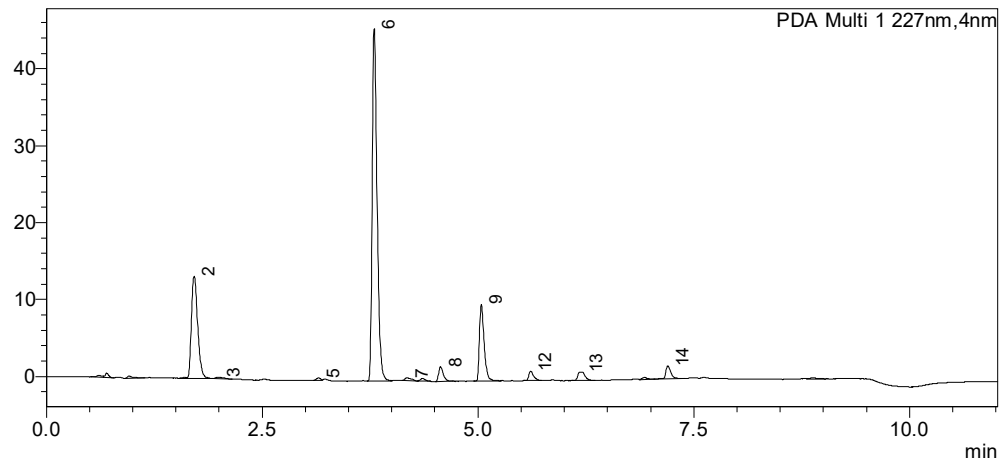

Leaves

mAU

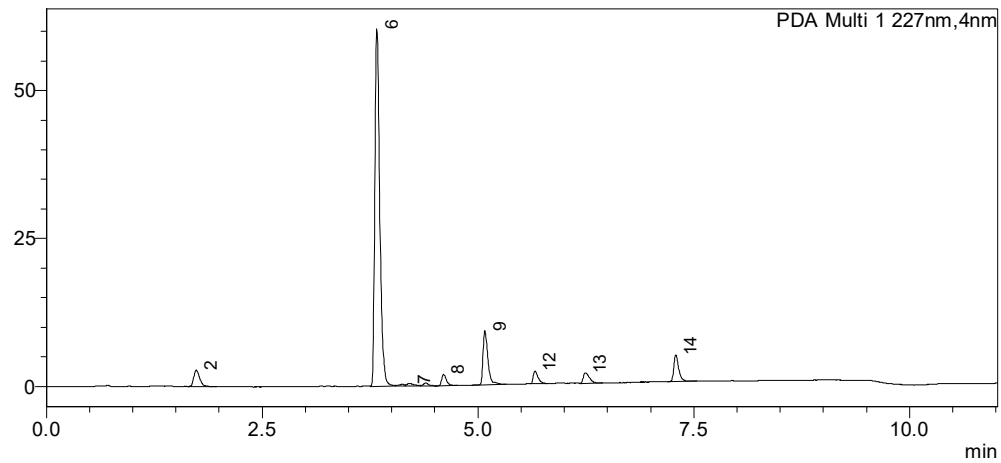

## ***Brassica oleracea***

Tops

mAU

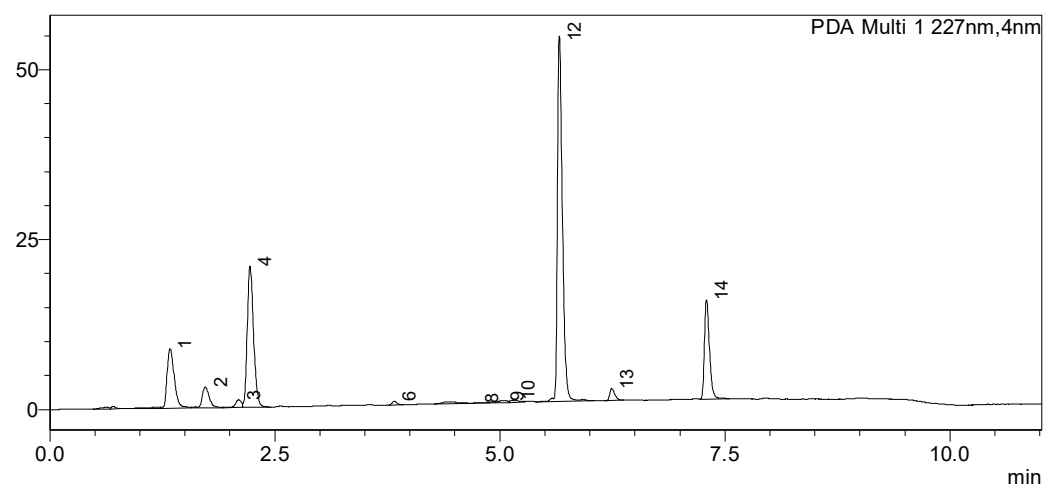

Leaves

mAU

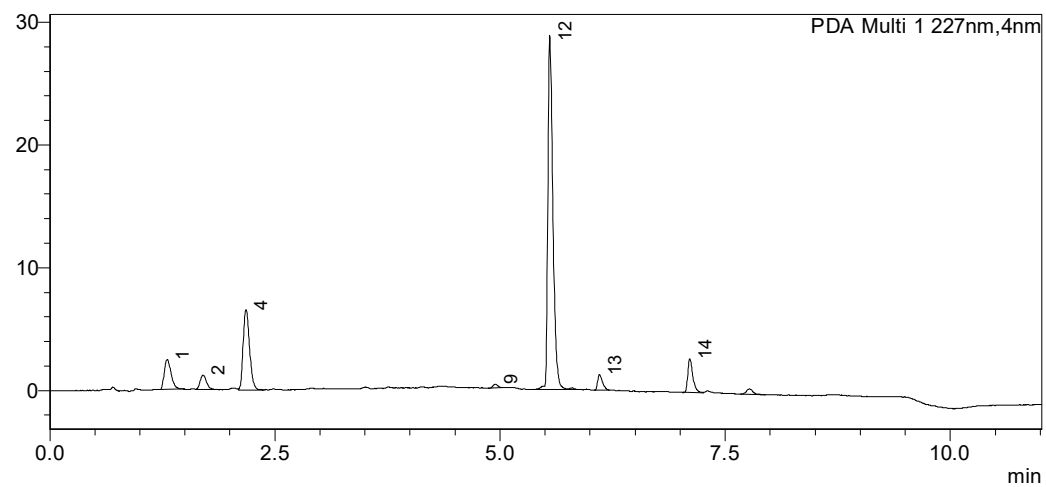

***Brassica napus***

Tops

mAU

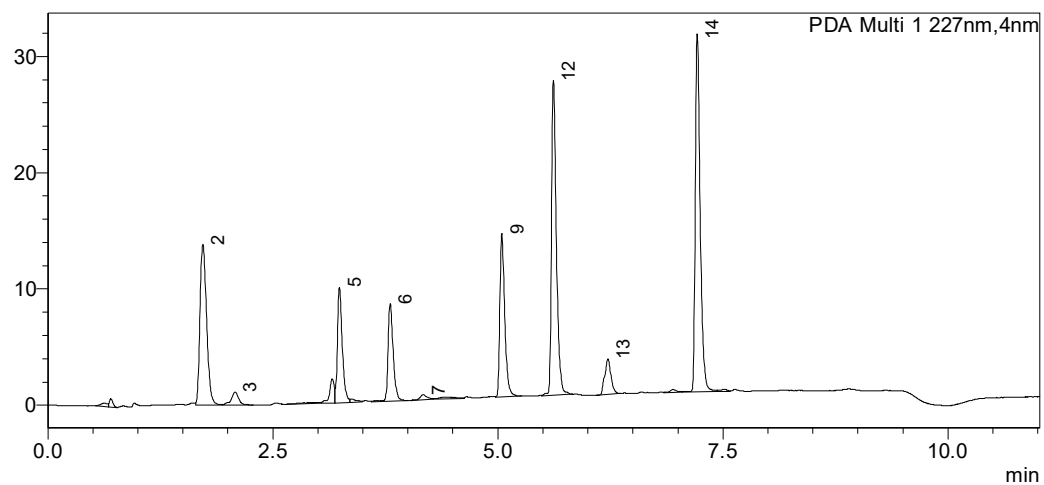

Leaves

mAU

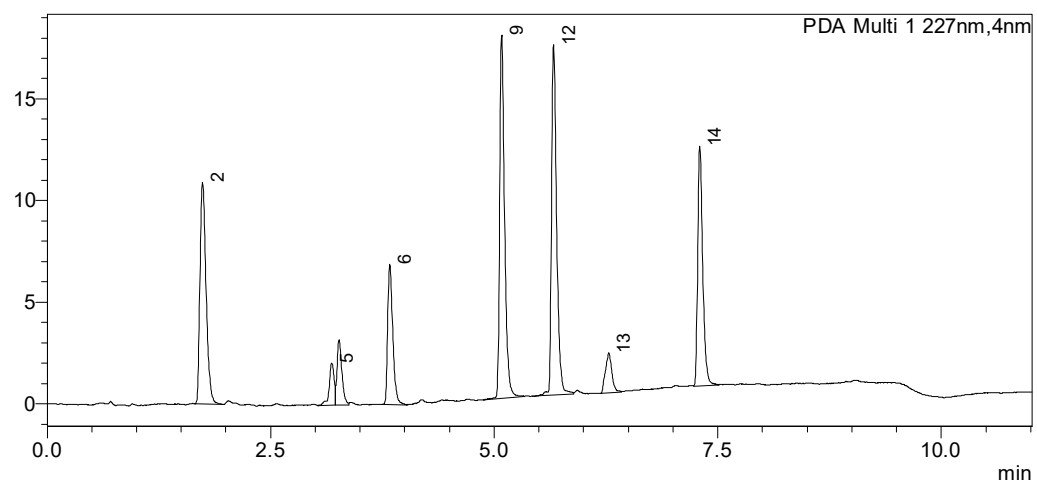

Supplement: s1 [file s1]
